# Supplementary material
Source: PubMed Central journal article supplement (PMC6382278)
Supplement: NIHMS1001137-supplement-1.pdf [file NIHMS1001137-supplement-1.pdf]

# SUPPLEMENTARY FIGURE 1

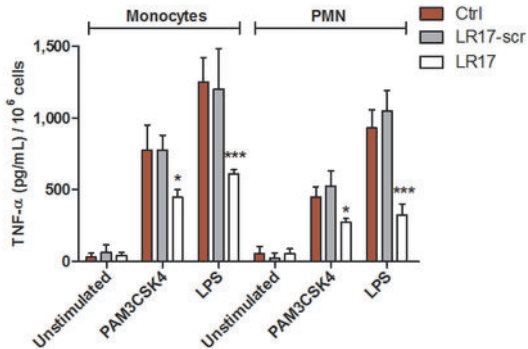

# SUPPLEMENTARY FIGURE 2

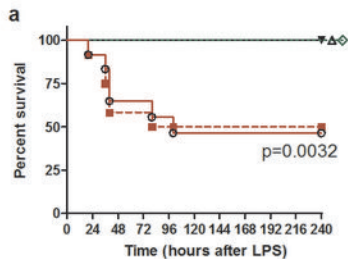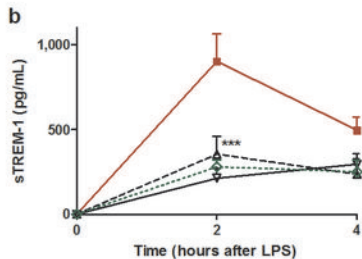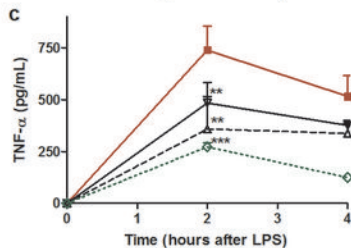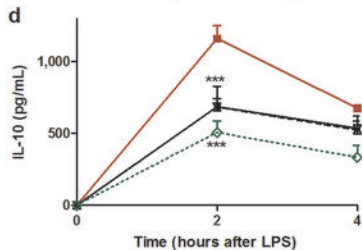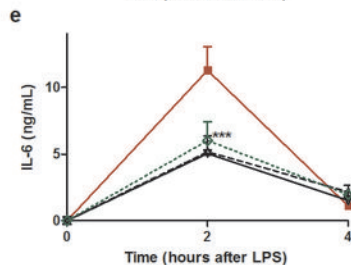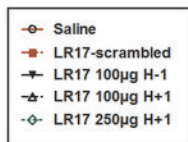

## **SUPPLEMENTARY FIGURES & TABLES**

### **Supplementary Figure 1**

#### **LR17 decreases TLR2- and TLR4-induced TNF- $\alpha$ production by monocytes and neutrophils.**

Isolated human monocytes and neutrophils were stimulated with 100ng/mL LPS or 10 $\mu$ g/mL PAM<sub>3</sub>CSK<sub>4</sub>, in presence of LR17 or LR17-scrambled (20 $\mu$ g/mL) for 24h, and supernatants assayed for TNF- $\alpha$  concentration by ELISA. Results are expressed as mean $\pm$ SD and are representative of 5 different experiments. \*p<0.05, \*\*p<0.01, \*\*\*p<0.001 LR17 vs LR17-scr.

### **Supplementary Figure 2**

#### **LR17 protects endotoxemic mice from death.**

(a-e) Male Balb/c mice (20–23 g) were randomly grouped (15 mice per group) and treated with an LD<sub>50</sub> of LPS. LR17, scrambled-LR17 (in 0.2 mL NaCl 0.9%), or 0.2 mL NaCl 0.9% was administered 60mins prior to or 60mins after LPS treatment. (a) LR17 treatment confers a survival advantage as shown by the survival curve (Log Rank test, p=0.0032) with no differences between doses or injection times of LR17. (b-e) plasma TNF- $\alpha$ , IL-6, IL-10 and sTREM-1 concentrations (n=4-6 per group at 2 and 4h). Results are expressed as mean $\pm$ SD. p values are \*p<0.05, \*\*p<0.01, \*\*\*p<0.001 compared with LR17-scrambled treated animals.

### **Supplementary Table 1**

**Effects of LR17 on various inflammatory lung and liver gene expressions during CLP.**

Data are representative of three different experiments, normalized by five housekeeping genes and expressed in  $2^{-\Delta Ct}$  and fold differences between LR17-scrambled- and LR17-treated animals. (ND: not detected).

**Supplementary Table 2**

**Characteristics of the patients at admission into the Intensive Care Unit.**

P values are for comparisons between infected and non-infected patients using Student' *t* test (for normally distributed values) or Mann Whitney test.

SAPSII stands for Simplified Acute Physiology Score II, and SOFA for Sequential Organ Failure Assessment score.

**SUPPLEMENTARY TABLE 1**

| Gene<br>&Symbol | Protein                                   | Liver               |              |                        |         | Lung                |              |                        |         |
|-----------------|-------------------------------------------|---------------------|--------------|------------------------|---------|---------------------|--------------|------------------------|---------|
|                 |                                           | $2^{-\Delta Ct}$    |              | Fold<br>differen<br>ce | P value | $2^{-\Delta Ct}$    |              | Fold<br>differen<br>ce | P value |
|                 |                                           | LR17-scr<br>treated | LR17 treated |                        |         | LR17-scr<br>treated | LR17 treated |                        |         |
| Adora2a         | Adenosine A2a receptor                    | 0.2                 | 0.068        | -2.94                  | <0.001  | 0.048               | 0.022        | -2.22                  | 0.04    |
| C8a             | Complement Component 8, alpha polypeptide | 7.2                 | 0.71         | -10.02                 | 0.0019  | ND                  | ND           | -                      | -       |
| Casp1           | Caspase 1                                 | 0.75                | 0.27         | -2.76                  | <0.001  | 0.21                | 0.074        | -2.82                  | 0.002   |
| Cd14            | CD14                                      | -                   | -            | -                      | -       | 1.7                 | 0.54         | -3.24                  | <0.001  |
| Crp             | C-reactive protein                        | 29                  | 4.2          | -6.86                  | 0.06    | -                   | -            | -                      | -       |
| IL-10           | Interleukin 10                            | 0.32                | 1.3          | 4.13                   | <0.001  | 0.14                | 0.0093       | -14.61                 | <0.001  |
| Il1a            | Interleukin 1 alpha                       | 4.4                 | 0.54         | -8.15                  | <0.001  | 0.37                | 0.099        | -3.76                  | <0.001  |
| Il1b            | Interleukin 1 beta                        | 12                  | 2.5          | -4.67                  | 0.007   | 1.7                 | 0.21         | -8.37                  | <0.001  |
| IL1ra           | IL-1 receptor antagonist                  | 9.8                 | 4.5          | -2.18                  | 0.01    | -                   | -            | -                      | -       |
| Il6             | IL-6                                      | 0.17                | 0.064        | -2.71                  | 0.005   | 0.095               | 0.044        | -2.14                  | <0.001  |
| Lbp             | LPS binding protein                       | 25                  | 1.3          | -19.23                 | 0.009   | 0.64                | 0.23         | -2.71                  | <0.001  |
| Mif             | MIF                                       | 46                  | 14           | -3.26                  | 0.04    | -                   | -            | -                      | -       |
| MyD88           | MyD88                                     | 0.3                 | 0.02         | -14.76                 | <0.001  | ND                  | ND           | -                      | -       |
| Nos2            | iNOS                                      | 3.2                 | 1.3          | -2.43                  | 0.0013  | -                   | -            | -                      | -       |
| Pglyrp2         | PG recognition protein 2                  | 1.6                 | 0.25         | -6.32                  | <0.001  | -                   | -            | -                      | -       |
| Proc            | Protein C                                 | 7.1                 | 0.53         | -13.41                 | 0.0017  | ND                  | ND           | -                      | -       |
| Ptafr           | Platelet-Activating Factor receptor       | 0.18                | 0.027        | -6.61                  | 0.004   | 0.085               | 0.022        | -3.93                  | 0.005   |
| Tgfb1           | TGF- $\beta$ 1                            | 0.37                | 0.026        | -13.89                 | <0.001  | -                   | -            | -                      | -       |

**SUPPLEMENTARY TABLE 2**

| <b>Parameter</b>                                      | <b>Overall<br/>(n=50)</b> | <b>Infected<br/>patients (n=24)</b> | <b>Non infected<br/>patients (n=26)</b> | <b>P value</b> |
|-------------------------------------------------------|---------------------------|-------------------------------------|-----------------------------------------|----------------|
| <b>Age, mean (SD) yrs</b>                             | 55.1 (18.2)               | 59.1 (16.3)                         | 51.2 (19.5)                             | 0.21           |
| <b>Sex, male (%)</b>                                  | 46                        | 42                                  | 53                                      | 0.48           |
| <b>SAPSII, mean (SD)</b>                              | 44 (19)                   | 49 (18)                             | 39 (19)                                 | 0.11           |
| <b>SOFA score, median<br/>(IQR)</b>                   | 5.0 (3.0-8.5)             | 8.0 (5.5-12.0)                      | 3.0 (2.0-5.0)                           | <0.0001        |
| <b>Procalcitonin,<br/>median (IQR) ng/mL</b>          | 1.02 (0.28-<br>6.47)      | 6.14 (0.74-<br>41.68)               | 0.38 (0.18-1.61)                        | 0.01           |
| <b>Soluble TREM-1,<br/>median (IQR) pg/mL</b>         | 415 (293-714)             | 628 (413-1233)                      | 331 (239-616)                           | 0.01           |
| <b>Soluble TREM-1<br/>ligand,<br/>median (IQR) RU</b> | 17.5 (0.0-70.5)           | 44.0 (19.0-98.0)                    | 0.0 (0.0-6.5)                           | <0.0001        |
